# Supplementary material
Source: PubMed Central journal article supplement (PMC9622993)
Supplement: jcsm.10126.sm001.pdf [file jcsm.10126.sm001.pdf]

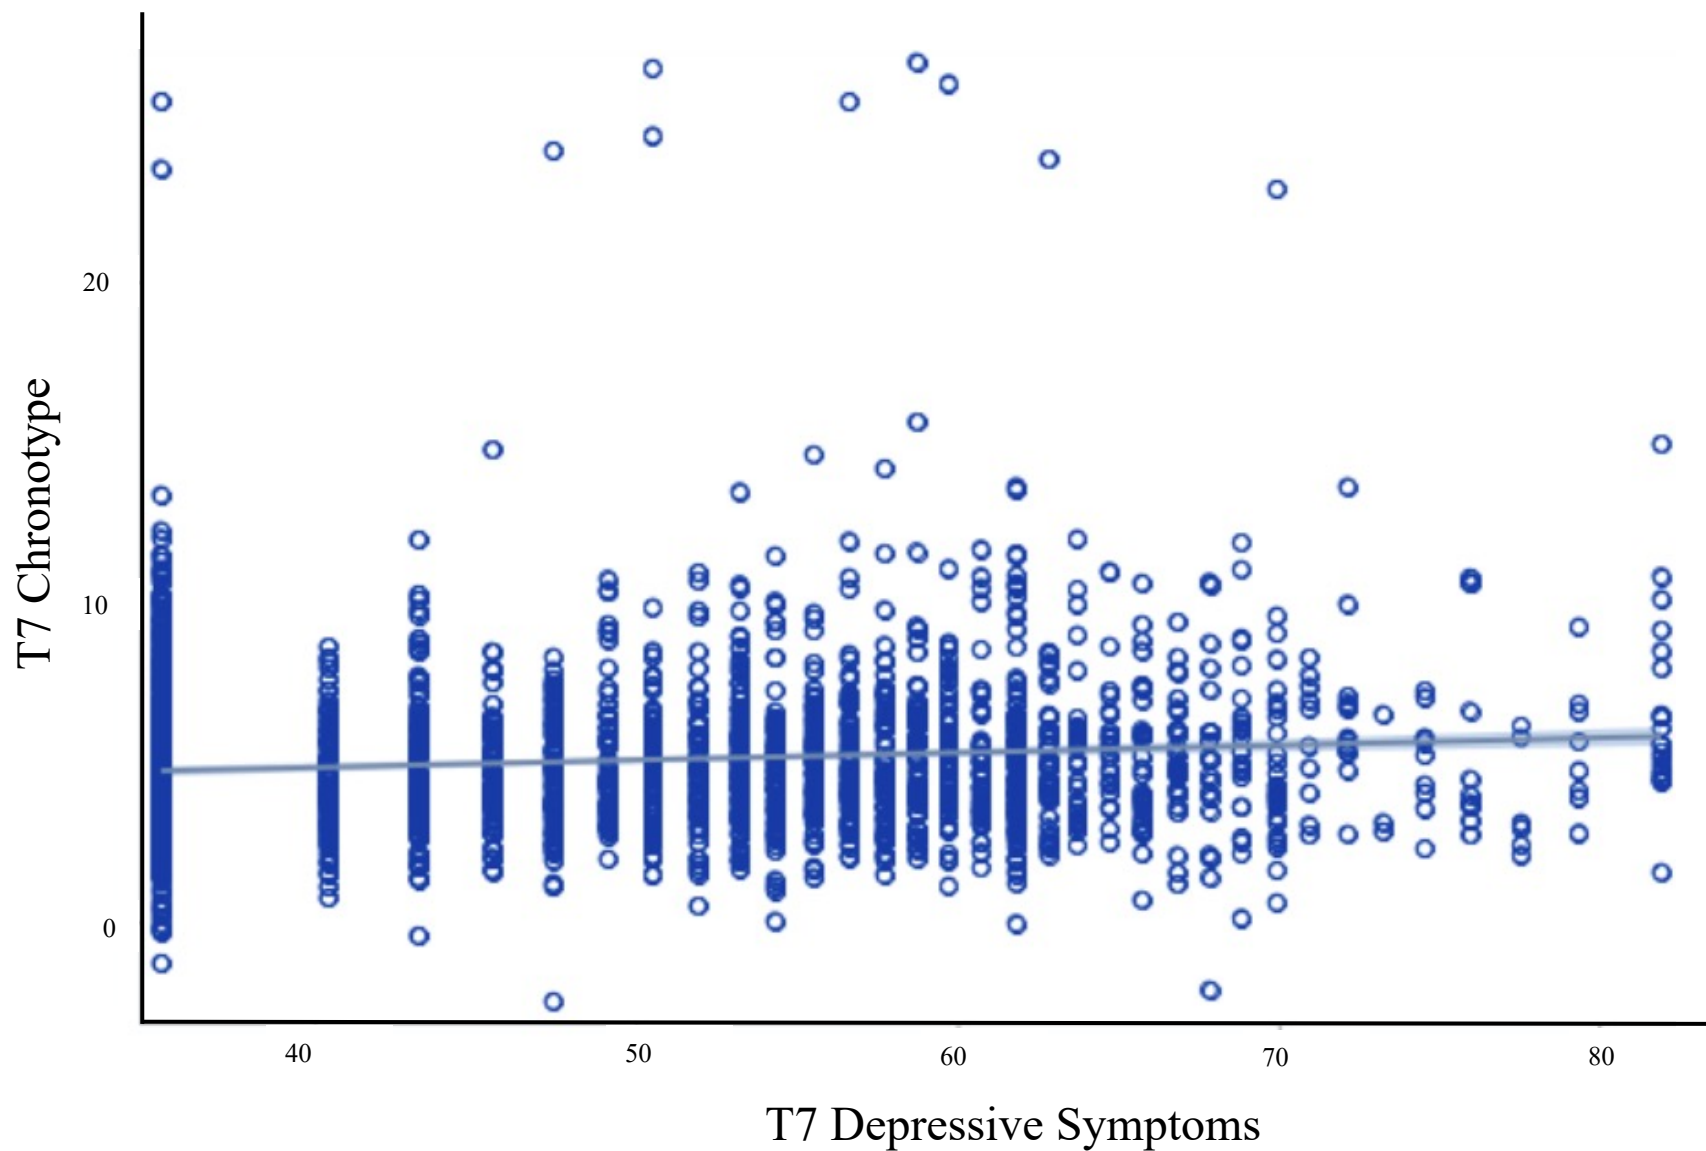

Figure S1. Bivariate correlation graph between T7 chronotype and T7 depressive symptoms. Greater chronotype reflects later (i.e., worse) chronotype and higher depressive scores reflect greater depressive symptoms.

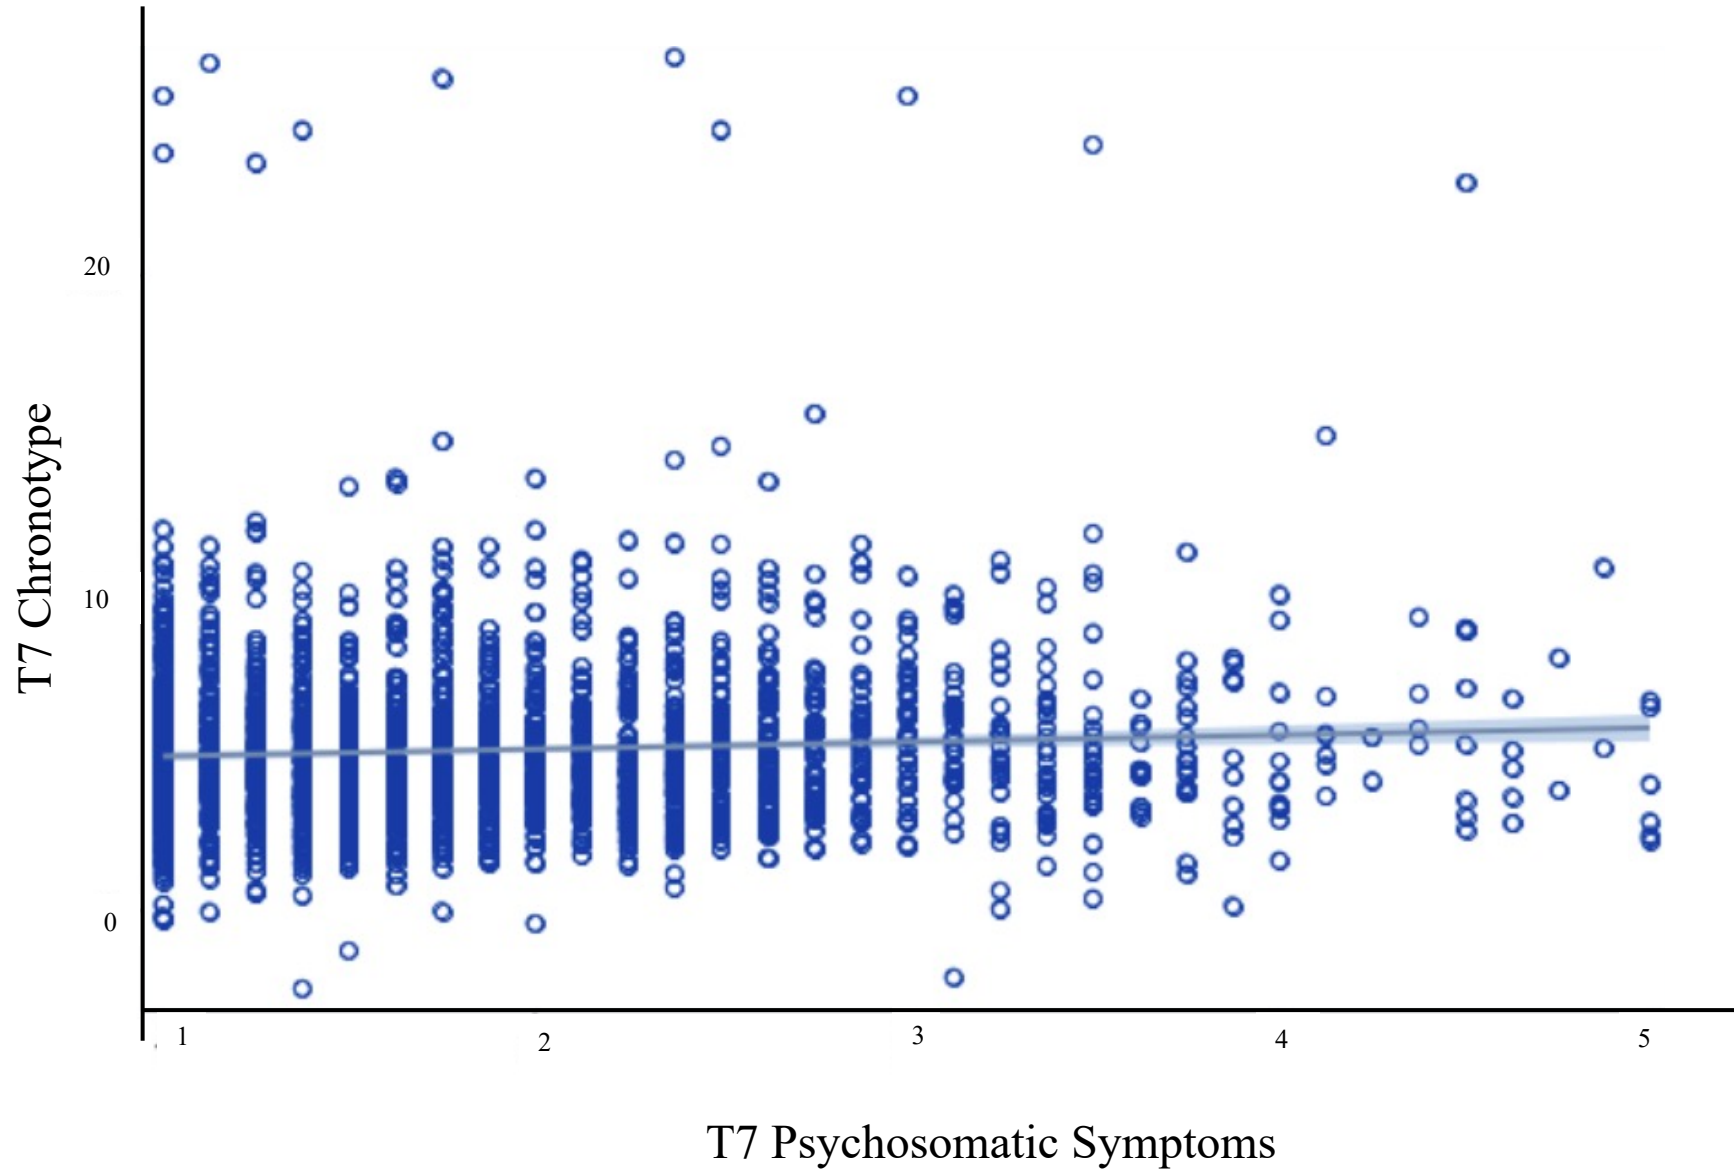

Figure S2. Bivariate correlation graph between T7 chronotype and T7 psychosomatic symptoms. Greater chronotype reflects later (i.e., worse) chronotype and higher psychosomatic scores reflect greater psychosomatic symptoms.
